# Supplementary material for: Polyhydroxylated [60]fullerene binds specifically to functional recognition sites on a monomeric and a dimeric ubiquitin
Source: Royal Society of Chemistry journal article supplement (doi:10.1039/c5nr00539f), 2015-01-01
Supplement: c5nr00539f1.pdf [file c5nr00539f1.pdf]

## SUPPORTING INFORMATION

### SUPPLEMENTARY FIGURES

A

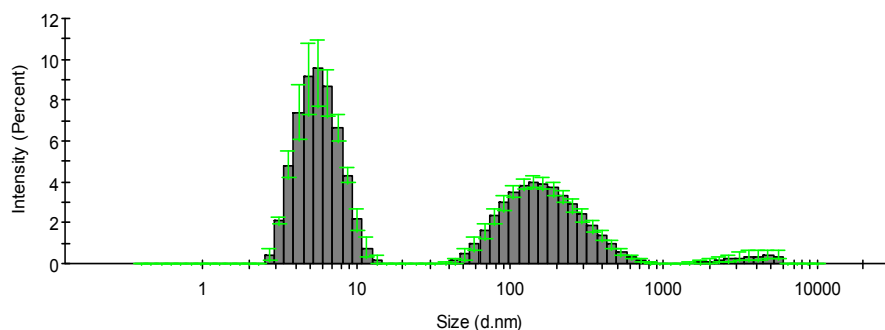

B

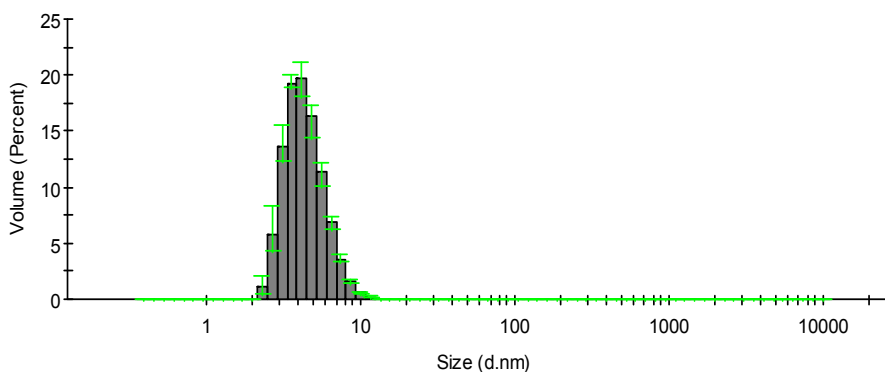

C

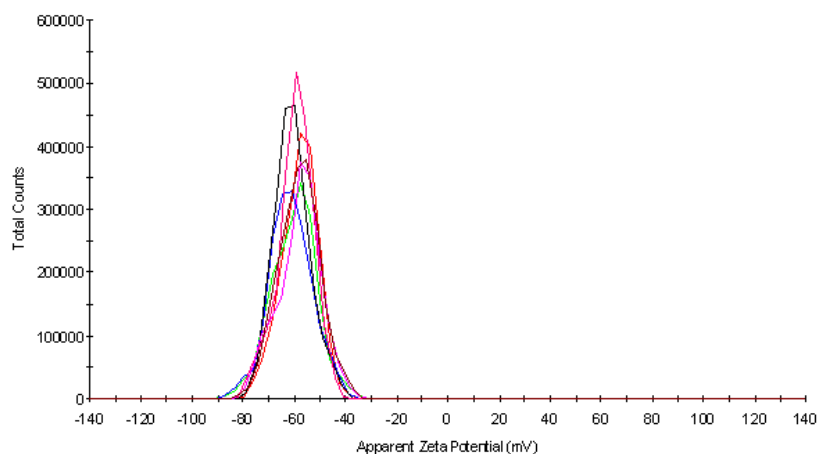

**Figure S1.** Characterization of fullereneol. A) Fullereneol particle size distribution determined by dynamic light scattering. The distribution curve is the average of three independent measurements. The intensity-weighted average was used to determine the hydrodynamic size. The error bars correspond to the standard deviation calculated from the measurements. The size distribution by volume (B) was used to estimate the relative importance of the two distinct populations in our interaction studies (after conversion into surface area). C)  $\zeta$  potential distribution traces for fullereneol obtained with seven independent measurements.

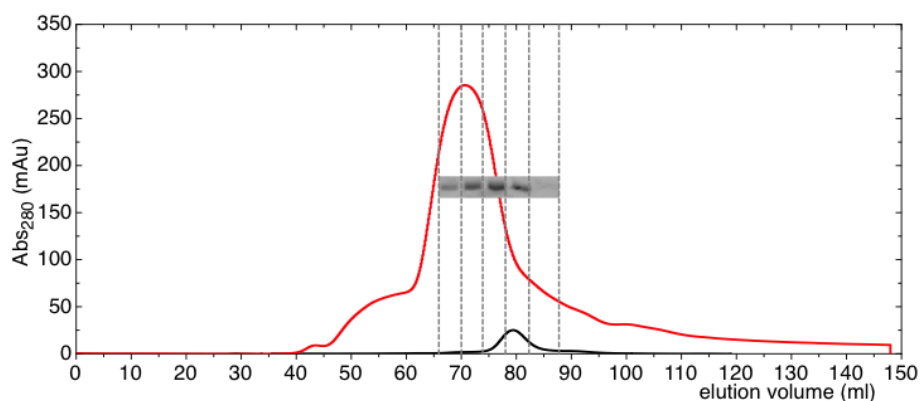

**Figure S2.** Monitoring fullerene/Ub interaction by size-exclusion chromatography. Size separation was obtained with a Superdex G75 (GE Healthcare) column. The black line corresponds to the elution profile of Ub alone, while the red line refers to a sample containing Ub and fullerene at  $[NP]/[protein] = 2$ . SDS-PAGE analysis of fractions from the Ub/fullerene sample (overlaid on the red profile) indicates the presence of Ub at smaller elution volume than that characteristic of free Ub. The concentration of Ub samples was  $400 \mu\text{M}$ .

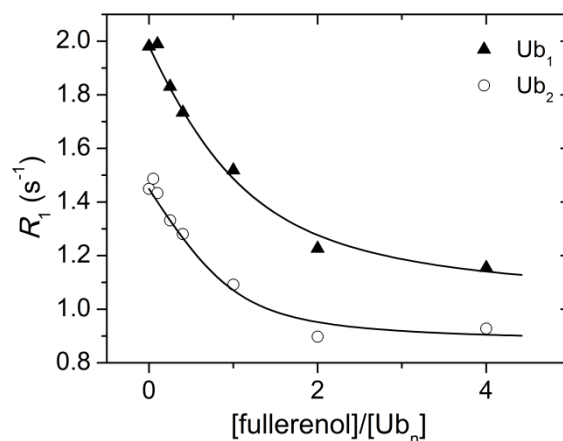

**Figure S3.** Concentration dependence of the  $^{15}\text{N}$  relaxation rate and determination of the  $K_d$ .  $^{15}\text{N}$  longitudinal relaxation rates are plotted against the NP/protein molar ratio. Data corresponding to Ub<sub>2</sub> were measured on Ub<sub>2</sub> ( $^{15}\text{N}$ -D). Best fit curves obtained assuming a 1:1 Ub:NP binding model are displayed.
